# Supplementary material
Source: PubMed Central journal article supplement (PMC4098858)
Supplement: supp_WNL.0b013e31826e9ad2_cerebralgray.pdf [file supp_WNL.0b013e31826e9ad2_cerebralgray.pdf]

## Cerebral gray and white matter changes and clinical course in metachromatic leukodystrophy

تغيرات المادة البيضاء والسنجابية والمسار الاكلينيكي لحثل المادة البيضاء المتبدل

غرض الدراسة:

حثل المادة البيضاء المتبدل مرض استقلابي نادر يؤدي لازالة الميالين وسوء الحالة العصبية بشكل عام . ولمعالجة هذا المرض فانه من الضروري أن نفهم طبيعة واليه تطوره. إن غرض الدراسة هو تقييم التغير بحجم الدماغ لدى الاطفال المصابين بمرض الحثل ومقارنتهم مع اطفال طبيعيين. منهاج الدراسة:

تم تحليل المعطيات في 18 طفلا المصابين بمرض الحثل مقارنة باثنين واربعين طفلا طبيعيا من الناحية العصبية متراوحة أعمارهم بين العشرين والتسعة وخمسين شهرا. خضع الكل لفحوص مورثية وكيميائية عضوية وقياسات فيسيولوجية عصبية بالاضافة لفحوص سريرية. بالاضافة لتحليل بيانات الرنين المغناطيسي (الزمن الثاني T2) لقياس حجم المادة البيضاء والسنجابية بالنسبة الى تطور الحالة السريرية.

النتائج:

حجم المادة البيضاء للمرضى لم يتباين عن نظيره في الشواهد بالرغم من أن منحنى النمو كان مختلفا قليلا. أما بالنسبة للمادة السنجابية للمرضى كان متوسط أحجامها اقل بـ 10.7% ( معامل ثقة 6-14.9%,  $p < 0.001$  ) عن الاطفال الاصحاء. لوحظ تزايد مقدار زوال الميالين مع زيادة مدة المرض ( $p < 0.003$ ) و مع زيادة التدهور الحركي ( $p < 0.001$ )

الاستنتاج:

حجم المادة السنجابية لمرضى حثل المادة البيضاء المتبدل اللون قليل مقارنة بالشواهد الاصحاء حتى عند الاعمار المبكرة. وهذا يعضد الرأي القائل بأنه بالاضافة الى زوال الميالين فإن اعتلال العصبونات الناتج من الاختزان العصبوني يلعب دورا اضافيا في عملية المرض . مقدار زوال الميالين المحسوب باستخدام الرنين المغناطيسي قد يكون وسيلة غير باضعة noninvasive تدلل على تطور المرض وقد تؤدي الغرض كمرجع للتدخل العلاجي.

Objective: Metachromatic leukodystrophy (MLD) is a rare metabolic disorder leading to demyelination and rapid neurologic deterioration. As therapeutic options evolve, it seems essential to understand and quantify progression of the natural disease. The aim of this study was to assess cerebral volumetric changes in children with MLD in comparison to normal controls and in relation to disease course.

Method: Eighteen patients with late-infantile MLD and 42 typically developing children in the same age range (20–59 months) were analyzed in a cross-sectional study. Patients underwent detailed genetic, biochemical, electrophysiologic, and clinical characterization. Cerebral gray matter (GM) and

white matter (WM) volumes were assessed by multispectral segmentation of T1- and T2-weighted MRI. In addition, the demyelinated WM (demyelination load) was automatically quantified in T2-weighted images of the patients, and analyzed in relation to the clinical course.

Results: WM volumes of patients did not differ from controls, although their growth curves were slightly different. GM volumes of patients, however, were on average 10.7% (confidence interval 6.0%-14.9%,  $p < 0.001$ ) below those of normally developing children. The demyelination load (corrected for total WM volume) increased with disease duration ( $p < 0.003$ ) and motor deterioration ( $p < 0.001$ ).

Conclusion: GM volume in patients with MLD is reduced when compared with healthy controls, already at young age. This supports the notion that, beside demyelination, neuronal dysfunction caused by neuronal storage plays an additional role in the disease process. The demyelination load may be a useful noninvasive imaging marker for disease progression and may serve as reference for therapeutic intervention.

---

**Translator: Ameer Almulhassani MD, Allen Memorial Hospital, Allen Neurology Center, Waterloo, IA**  
**Translation Reviewer: Islam M. Tafish MD, Allen Memorial Hospital, Allen Neurology Center, Waterloo, IA**
