# Supplementary material
Source: PubMed Central journal article supplement (PMC4098858)
Supplement: supp_WNL.0b013e31826e9ad2_WNL204309-443978_Figure_e-1.pdf [file supp_WNL.0b013e31826e9ad2_WNL204309-443978_Figure_e-1.pdf]

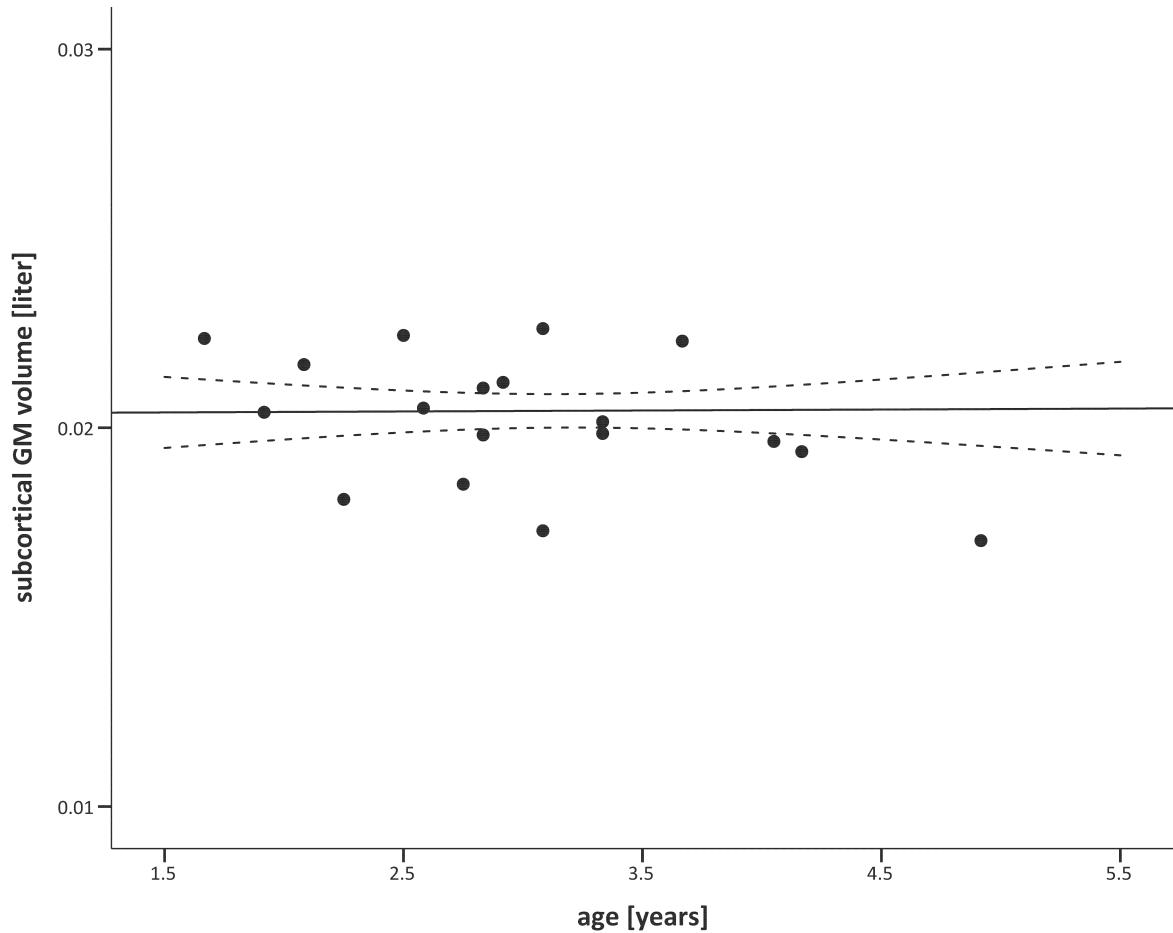

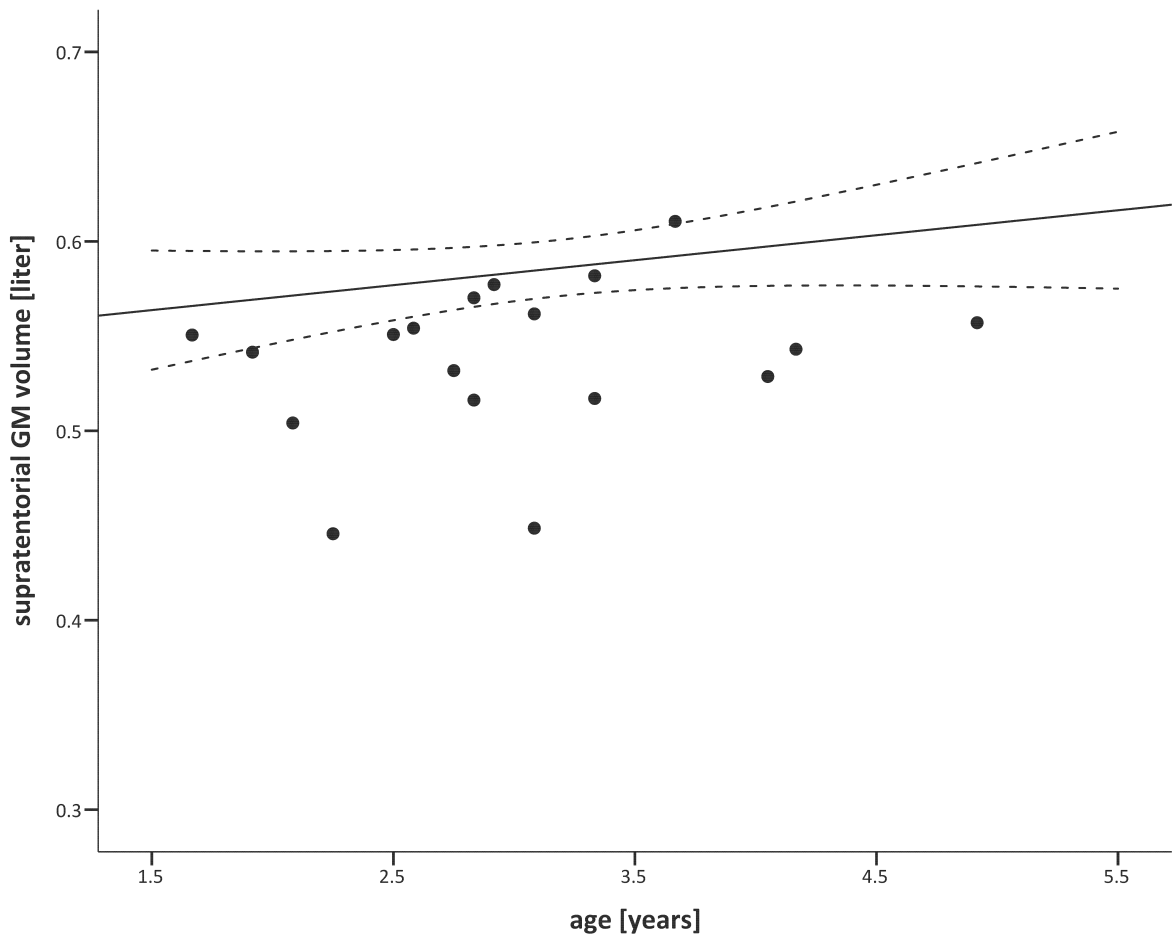

cerebellar GM volume [liter]

0.1

0.0

1.5

2.5

3.5

4.5

5.5

age [years]

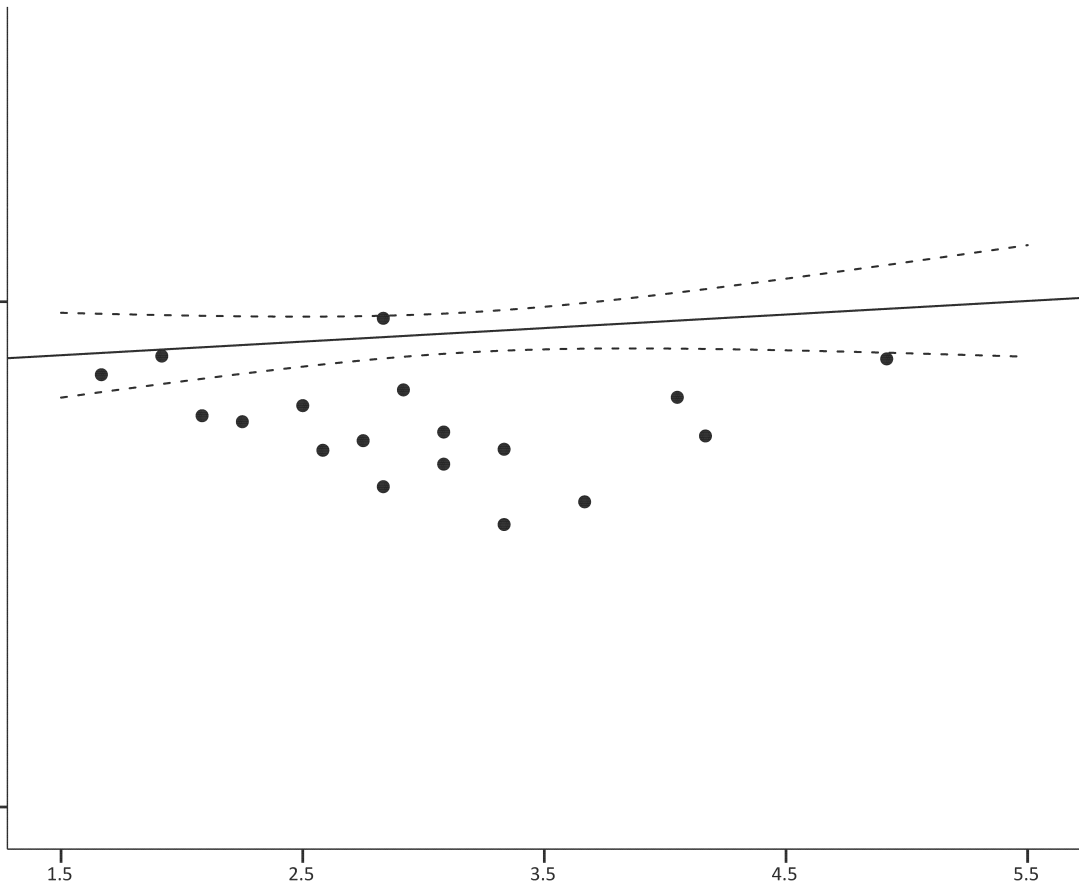

**Figure e-1:** Volumes of subcortical (thalamus and basal ganglia) (a), supratentorial cortical (b), and cerebellar GM (c). Single dots indicate MLD patients and mean regression line (and its 95% confidence intervals) represent data of control subjects.
